# Supplementary material for: Malaria Infection and Risk for Endemic Burkitt Lymphoma: A Systematic Review and Meta-Analysis
Source: MDPI journal article supplement (doi:10.3390/ijerph18115886), 2021-05-30
Supplement: s1 [file s1]

**Table S1.** Search terms.

| <b>Databases</b>   | <b>Search terms</b>                                                                                                                                                        | <b>Search date</b> |
|--------------------|----------------------------------------------------------------------------------------------------------------------------------------------------------------------------|--------------------|
| MEDLINE (PubMed)   | (malaria OR Plasmodium) AND (neoplasia OR neoplasias OR neoplasm OR tumors OR tumor OR cancer OR cancers OR malignancy OR malignancies) AND (risk OR risks OR odd OR odds) | 27 March 2021      |
|                    | Search option: All fields<br>Search results: 514                                                                                                                           |                    |
| Scopus             | (malaria OR Plasmodium) AND (neoplasia OR neoplasias OR neoplasm OR tumors OR tumor OR cancer OR cancers OR malignancy OR malignancies) AND (risk OR risks OR odd OR odds) | 27 March 2021      |
|                    | Search option: title, abstract, keywords<br>Search results: 932                                                                                                            |                    |
| ISI Web of Science | (malaria OR Plasmodium) AND (neoplasia OR neoplasias OR neoplasm OR tumors OR tumor OR cancer OR cancers OR malignancy OR malignancies) AND (risk OR risks OR odd OR odds) | 27 March 2021      |
|                    | Search option: All fields<br>Search results: 694                                                                                                                           |                    |

**Table S2.** Assessment of risk of bias relating to individual studies using the Joanna Briggs Institute for case-control studies.

| No. | Authors                  | Groups comparable | Cases and controls matched | Same criteria used for identification of cases and controls | Exposure measured in a standard, valid and reliable way | Exposure measured in the same way for cases and controls | Confounding factors identified | Strategies to deal with confounding factors | Outcomes assessed in a standard, valid and reliable way | The exposure period of interest long enough | Appropriate statistical analysis | Score (10) |
|-----|--------------------------|-------------------|----------------------------|-------------------------------------------------------------|---------------------------------------------------------|----------------------------------------------------------|--------------------------------|---------------------------------------------|---------------------------------------------------------|---------------------------------------------|----------------------------------|------------|
| 1   | Derkach et al., 2019     | Yes               | Yes                        | Yes                                                         | Yes                                                     | Yes                                                      | Unclear                        | Unclear                                     | Yes                                                     | Not applicable                              | Yes                              | 7 (70%)    |
| 2   | Johnston et al., 2014    | Yes               | Yes                        | Yes                                                         | Yes                                                     | Yes                                                      | Unclear                        | Unclear                                     | Yes                                                     | Not applicable                              | Yes                              | 7 (70%)    |
| 3   | Legason et al., 2017     | Yes               | Yes                        | Yes                                                         | Yes                                                     | Yes                                                      | Unclear                        | Unclear                                     | Yes                                                     | Not applicable                              | Yes                              | 7 (70%)    |
| 4   | Peprah et al., 2020      | Yes               | Yes                        | Yes                                                         | Yes                                                     | Yes                                                      | Unclear                        | Unclear                                     | Yes                                                     | Not applicable                              | Yes                              | 7 (70%)    |
| 5   | Wyss et al., 2020        | Yes               | Yes                        | Yes                                                         | Yes                                                     | Yes                                                      | Unclear                        | Unclear                                     | Yes                                                     | Not applicable                              | Yes                              | 7 (70%)    |
| 6   | Aguilar et al., 2017     | Yes               | Yes                        | Yes                                                         | Yes                                                     | Yes                                                      | Unclear                        | Unclear                                     | Yes                                                     | Not applicable                              | Yes                              | 7 (70%)    |
| 7   | Aka et al., 2013         | Yes               | Yes                        | Yes                                                         | Yes                                                     | Yes                                                      | Unclear                        | Unclear                                     | Yes                                                     | Not applicable                              | Yes                              | 7 (70%)    |
| 8   | Carpenter et al., 2008   | Yes               | Yes                        | Yes                                                         | Yes                                                     | Yes                                                      | Unclear                        | Unclear                                     | Yes                                                     | Not applicable                              | Yes                              | 7 (70%)    |
| 9   | Guech-Ongey et al., 2012 | Yes               | Yes                        | Yes                                                         | Yes                                                     | Yes                                                      | Unclear                        | Unclear                                     | Yes                                                     | Not applicable                              | Yes                              | 7 (70%)    |
| 10  | Mutalima et al., 2008    | Yes               | Yes                        | Yes                                                         | Yes                                                     | Yes                                                      | Unclear                        | Unclear                                     | Yes                                                     | Not applicable                              | Yes                              | 7 (70%)    |
